# Supplementary material for: Polymersome-based ion-selective nano-optodes containing ionophores
Source: Royal Society of Chemistry journal article supplement (doi:10.1039/d3sd00133d), 2023-01-01
Supplement: d3sd00133d1.pdf [file d3sd00133d1.pdf]

Supporting Information for

## Polymersome-based Ion-Selective Nano-Optodes Containing Ionophores

Yunxin Cui<sup>a</sup>, Jingying Zhai<sup>b</sup>, Yifu Wang<sup>a</sup>, and Xiaojiang Xie<sup>\*a</sup>

a. Department of Chemistry, Southern University of Science and Technology, Shenzhen, 518055, China.

b. Academy for Advanced Interdisciplinary Studies, Southern University of Science and Technology, Shenzhen, 518055, China.

Corresponding author E-mail: xiexj@sustech.edu.cn

The degree of protonation  $1 - \alpha$  is calculated using the following equation:

$$1 - \alpha = \frac{A - A_{\min}}{A_{\max} - A_{\min}}$$

where  $A_{\min}$  is the minimum absorbance of the polymersomes at 670 nm measured in NaOH solution, and  $A_{\max}$  is the maximum absorbance measured in HCl solution.

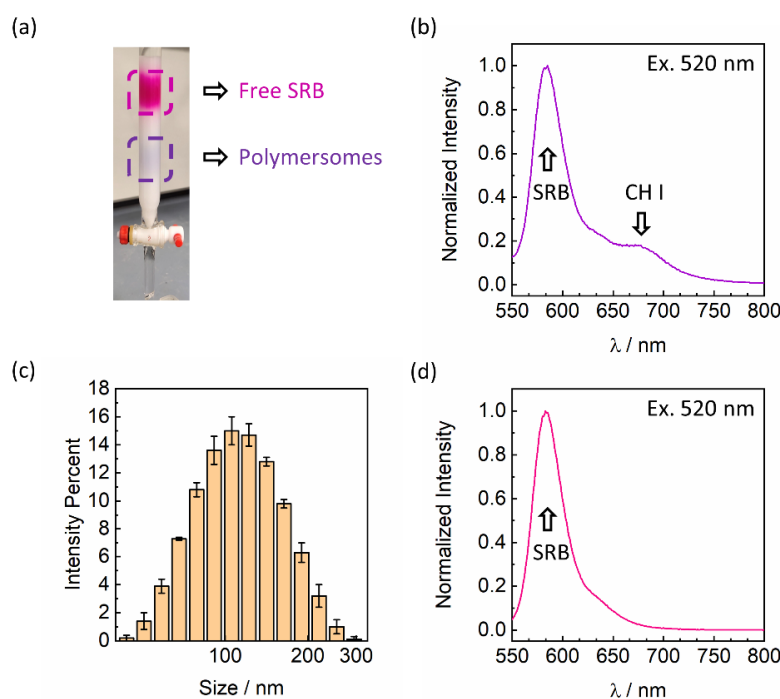

**Fig. S1** Purification of  $\text{Ca}^{2+}$ -selective polymersomes encapsulating the hydrophilic dye (SRB) through Gel Chromatography (Sephadex G-25 Superfine). (a) Picture of the column during the separation process (the magenta section: free SRB; the purple section: polymersomes). (b) The fluorescence emission spectrum of the purple polymersome section. (c) The hydrodynamic size distribution of the purple polymersome section. (d) The fluorescence emission spectrum of the free SRB section.

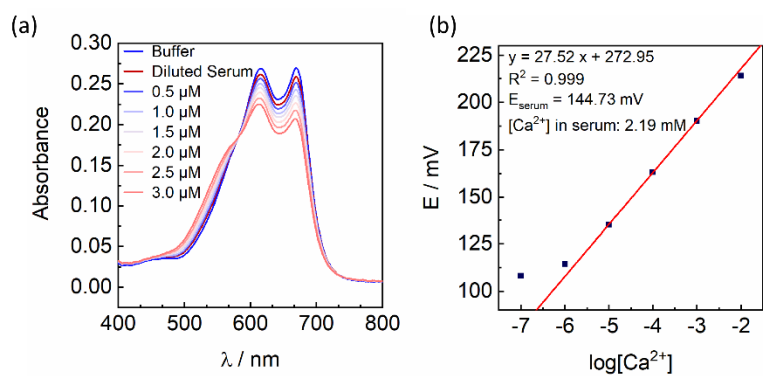

**Fig. S2** (a) Absorption spectra of the  $\text{Ca}^{2+}$ -selective polymersome solution with serum and known additional  $\text{CaCl}_2$ . (b) Calibration and determination of the  $\text{Ca}^{2+}$  concentration in diluted human serum by the  $\text{Ca}^{2+}$ -selective electrodes.

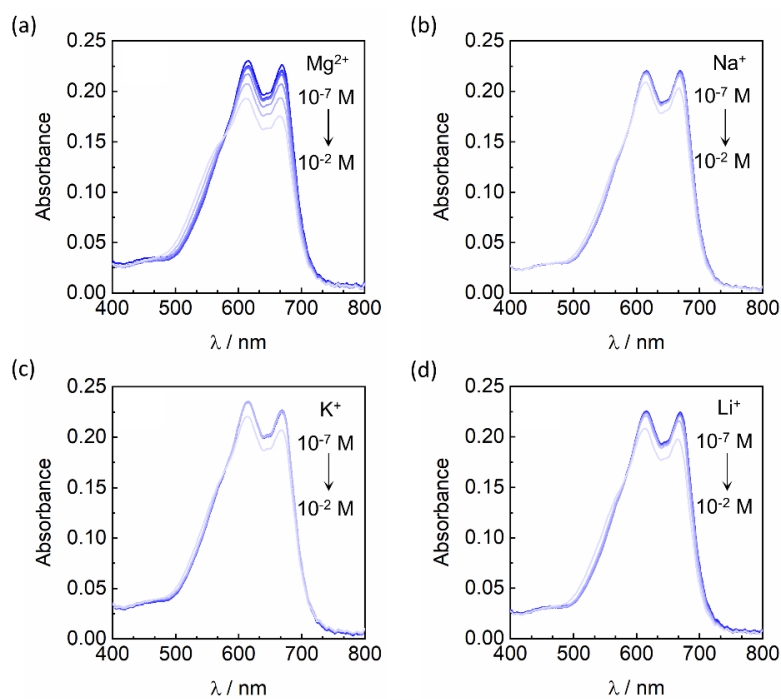

**Fig. S3** Absorption spectra of the  $\text{Ca}^{2+}$ -selective polymersomes with different interfering ion concentrations (from  $10^{-7}$  M to  $10^{-2}$  M). (a)  $\text{MgCl}_2$ , (b)  $\text{NaCl}$ , (c)  $\text{KCl}$ , and (d)  $\text{LiCl}$ .

**Table S1** Comparison of selectivity coefficients between the  $\text{Ca}^{2+}$ -selective polymersomes in this work and various previous Nano-Optodes

| Matrix                       | $\log K_{\text{Ca,Mg}}$ | $\log K_{\text{Ca,Na}}$ | $\log K_{\text{Ca,K}}$ | $\log K_{\text{Ca,Li}}$ |
|------------------------------|-------------------------|-------------------------|------------------------|-------------------------|
| Polymersome*                 | -4.17                   | -5.08                   | -4.64                  | -4.63                   |
| PEG-lipid, DOS <sup>1</sup>  | -4.00                   | -                       | -                      | -                       |
| PVC, DOS <sup>2</sup>        | -3.30                   | -4.90                   | -4.30                  | -                       |
| Lipid, wax, oil <sup>3</sup> | -3.91                   | -3.86                   | -3.87                  | -4.26                   |

\* The transition points of response curves were used to calculate the selectivity coefficients where the  $1-\alpha$  value was 0.61.

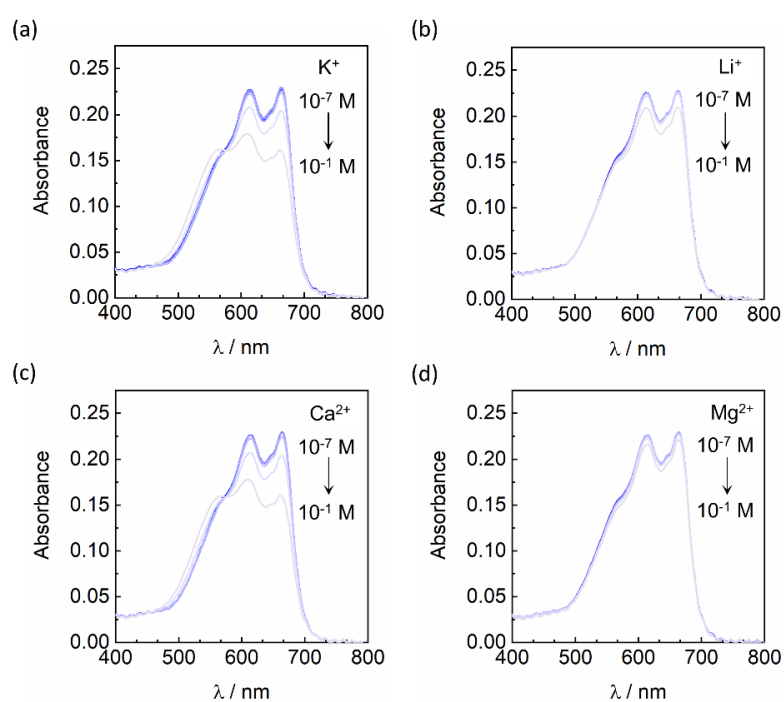

**Fig. S4** Absorption spectra of the  $\text{Na}^+$ -selective polymersomes with different interfering ion concentrations (from  $10^{-7}$  M to  $10^{-1}$  M). (a) KCl, (b) LiCl, (c)  $\text{CaCl}_2$ , and (d)  $\text{MgCl}_2$ .

**Table S2** Comparison of selectivity coefficients between the  $\text{Na}^+$ -selective polymersomes in this work and the previous PS-PEO Nano-Optodes

| Matrix              | $\log K_{\text{Na,K}}$ | $\log K_{\text{Na,Li}}$ | $\log K_{\text{Na,Ca}}$ | $\log K_{\text{Na,Mg}}$ |
|---------------------|------------------------|-------------------------|-------------------------|-------------------------|
| Polymersome*        | -2.36                  | -3.56                   | -2.42                   | -4.30                   |
| PS-PEO <sup>4</sup> | -2.3                   | -3.2                    | -2.8                    | -3.8                    |

\* The transition points of response curves were used to calculate the selectivity coefficients where the  $1-\alpha$  value was 0.67.

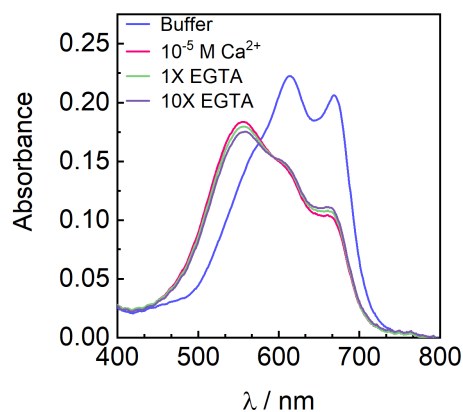

**Fig. S5** Irreversible response of the  $\text{Ca}^{2+}$ -selective polymersomes to  $\text{Ca}^{2+}$  upon the addition of the well-known chelator ethylene glycol tetraacetic acid, EGTA, (1X mean the addition of  $10^{-5}$  M EGTA while 10X mean the addition of  $10^{-4}$  M EGTA).

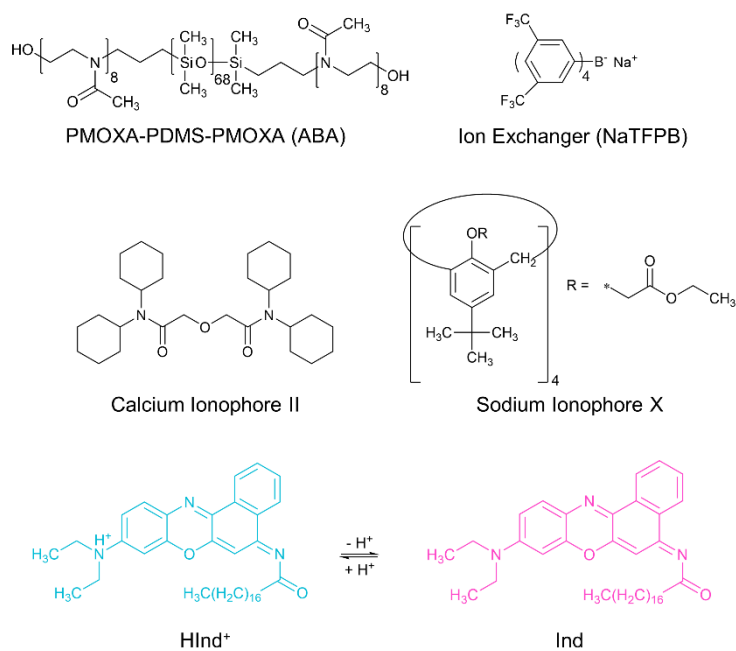

**Fig. S6** Chemical structures of the copolymer matrix (PMOXA-PDMS-PMOXA, ABA), ion exchanger (NaTFPB), ionophores (Calcium Ionophore II and Sodium Ionophore X), and chromoionophore I (protonated  $\text{HInd}^+$  and deprotonated Ind forms).

#### References:

- 1 V. Bychkova and A. Shvarev, *Anal. Chem.*, 2009, **81**, 2325-2331.
- 2 G. Rong, E. H. Kim, K. E. Poskanzer and H. A. Clark, *Scientific Reports*, 2017, **7**, 10819.
- 3 A. L. Dailey, M. D. Greer, T. Z. Sodia, M. P. Jewell, T. A. Kalin and K. J. Cash, *Biosensors*, 2020, **10**, 120.
- 4 X. Du, R. Wang, J. Zhai, X. Li and X. Xie, *ACS Appl. Nano Mater.*, 2020, **3**, 782-788.
